# Supplementary material for: The tobacco phosphatidylethanolamine-binding protein NtFT4 increases the lifespan of Drosophila melanogaster by interacting with the proteostasis network
Source: Aging (Albany NY). 2022 Apr 8;14(7):2989–3029. doi: 10.18632/aging.204005 (PMC9037272; doi:10.18632/aging.204005)
Supplement: Supplementary Table 5 [file aging-14-204005-s004.xlsx]

## Sheet: Gene list FC >1.5
Supplementary Table 5. Differentially expressed genes in female da > NtFT4 flies.
Gene Symbol	RefSeq Transcript ID	FC	p	Expression in da > NtFT4
Cyp6a17	NM_143761	-10.1634	0.000642906	down
CG17478///CR44101	NR_073825	-6.88915	0.00205121	down
CG11825	NM_001273936	-6.87496	0.035959	down
Mef2	NM_001273912	-4.89423	0.000989399	down
CG31205	NM_169915	-4.26943	0.0132583	down
Jon66Ci	NM_168271	-3.89662	0.000949816	down
l(2)03659	NM_001273894	-3.50512	0.00022035	down
CG18609	NM_137521	-3.25578	0.00232998	down
Drsl4	NM_168021	-3.1963	0.0264435	down
Fad2	NM_143709	-2.79666	0.00638421	down
LysP	NM_057480	-2.66608	0.00151873	down
Lectin-galC1	NM_001201916	-2.63776	0.00982251	down
CG12057	NM_001272450	-2.52335	0.00556319	down
2mit	NM_001275600	-2.5189	0.00809393	down
CG13422///CG7655	NM_137639	-2.46493	0.036653	down
CG17322	NM_136067	-2.459	0.000719316	down
CG30272	NM_166564	-2.42787	0.041869	down
CG16898	NM_137608	-2.41213	0.0296427	down
CG13822	NM_142908	-2.30297	0.00115063	down
α-Est10	NM_001260033	-2.28753	0.00342585	down
CG32523///DsecCG32523	NM_167738	-2.26066	0.0116434	down
CG31681	NM_164473	-2.25852	0.0040529	down
miple	NM_001274268	-2.16017	0.00617703	down
Hsc70-2	NM_079615	-2.12505	0.0193977	down
CG31380	NM_170242	-2.10289	0.0136457	down
Spn47C	NM_001169645	-2.09557	0.0141672	down
CG7900	NM_001104237	-2.07868	0.00550642	down
Odc1	NM_057704	-2.0446	0.00203374	down
CG32277	NM_168002	-2.02579	0.0472117	down
GstE5	NM_137483	-2.01834	0.0481571	down
Npc2d	NM_141718	-2.0052	0.0157164	down
to	NM_079773	-1.99496	0.027441	down
CG2022	NM_141254	-1.98759	0.00651255	down
Nop60B	NM_001014547	-1.98064	0.000508158	down
CG13877	NM_001202084	-1.97577	0.0201391	down
Her	NM_080355	-1.951	0.0203563	down
CG11841	NM_143404	-1.93332	0.0347504	down
Cpr57A///Obp57d	NM_001144249	-1.93093	0.036463	down
CG4562	NM_001104371	-1.92483	0.00771319	down
CG42369	NM_135180	-1.91542	0.0145744	down
CG8317	NM_001259439	-1.89309	0.0498445	down
Cpr72Ec	NM_140627	-1.88511	0.0360261	down
CG15434	NM_144084	-1.88377	0.0271796	down
CG13742	NM_001273884	-1.87636	0.00449159	down
CG16904	NM_141700	-1.85999	0.0135636	down
CG15358	NM_134785	-1.85752	0.0169867	down
CG9988	NM_143368	-1.84377	0.00536376	down
CG9459	NM_141701	-1.84323	0.0365767	down
CG13284	NM_001273593	-1.8304	0.00881075	down
CG12338	NM_136759	-1.82363	0.0183283	down
mthl8	NM_001274253	-1.78299	0.00174937	down
mthl8	NM_001274253	-1.75692	0.00059201	down
CG10924///Pepck	NM_001103897	-1.71488	0.0105653	down
CG15531	NM_143523	-1.70373	0.0247864	down
Cyp6a8	NM_079025	-1.70209	0.0456152	down
CG3835	NM_130626	-1.69396	0.0258758	down
CG7966	NM_141999	-1.68463	0.00475547	down
CG11357	NM_001104035	-1.68213	0.00285445	down
CG10208	NM_142929	-1.67912	0.0281091	down
CG42565	NM_137858	-1.6735	0.017625	down
Send1	NM_134818	-1.67134	0.0372095	down
CG3348	NM_144004	-1.66705	0.0363703	down
CG6067	NM_132055	-1.65806	0.043484	down
CG14153	NM_140147	-1.65724	0.0151579	down
Spn43Ab	NM_001032224	-1.65559	0.0185123	down
CG32553	NM_167609	-1.65134	0.0112126	down
CG16926	NM_144107	-1.65085	0.0381369	down
yellow-b	NM_078862	-1.6457	0.0434406	down
AcCoAS	NM_001014599	-1.6372	0.0421361	down
CG14528	NM_143386	-1.63492	0.0277356	down
CG42235	NM_001144639	-1.62121	0.0496812	down
gfA	NM_001169324	-1.62031	0.0261271	down
Cyp4e1	NM_080032	-1.61691	0.0142938	down
GstE9	NM_166279	-1.61139	0.0131016	down
CG42694	NM_001202065	-1.6093	0.0179046	down
Akh	NM_079194	-1.60811	0.0141278	down
CG32687	NM_001272483	-1.60423	0.01344	down
CG31157	NM_001104299	-1.60151	0.018093	down
CG10479	NM_001274529	-1.59952	0.00486509	down
CG32284	NM_167997	-1.59177	0.0123077	down
CG10307	NM_137761	-1.59088	0.00375446	down
CG6660	NM_142847	-1.56571	0.0416647	down
Cyp317a1	NM_137160	-1.56038	0.000339193	down
CG11211	NM_136364	-1.56035	0.0441602	down
CG33177///CG33178	NM_176730	-1.55802	0.0479222	down
alpha-Est9	NM_079534	-1.55715	0.0306081	down
CG15201	NM_132463	-1.55314	0.0246431	down
Kaz1-ORFB	NM_001031920	-1.55214	0.0262049	down
CG31030	NM_001043310	-1.54807	0.0203597	down
CG7567	NM_143442	-1.54038	0.036219	down
2mit	NM_001275600	-1.53992	0.00505245	down
vir-1	NM_001038812	-1.53791	0.0244678	down
CG30269	NM_137860	-1.53759	0.0326754	down
CG11437	NM_141136	-1.53618	0.00403662	down
CG11155	NM_143684	-1.53508	0.0463089	down
Tequila	NM_001169922	-1.5314	0.0398759	down
CG11454	NM_134653	-1.52963	0.0136219	down
CG10433	NM_137746	-1.51895	0.0130803	down
CG12116///DsecCG12116	NM_132253	-1.50912	0.00902171	down
CG18343	NM_001273982	-1.50512	0.0172477	down
CG11893	NM_143118	5.21436	0.0190953	up
CG1077	NM_141360	4.6994	0.0278653	up
TotC	NM_080518	3.30996	0.0274531	up
CG13113	NM_135452	3.23021	0.0425963	up
CG1304	NM_134574	3.01759	0.00909806	up
CG15571	NM_131925	2.8637	0.0425618	up
CG10163///DsecCG10163	NM_139785	2.62759	0.0406102	up
CG14406	NM_132756	2.61021	0.00633785	up
CG15661	NM_001043100	2.27429	0.0115682	up
CG4302///DsecCG4302	NM_137719	2.22145	0.00792974	up
Ubqn	NM_134500	2.21002	0.00259067	up
CG15820	NM_139439	2.19961	0.000386752	up
CG9945	NM_137650	2.17291	0.00399664	up
CG15534	NM_143535	2.08555	0.00836718	up
dpr6	NM_001274744	2.04097	0.0131185	up
Ser6	NM_078702	2.00214	0.0428373	up
CG14410	NM_132745	1.98282	0.0165408	up
CG11034	NM_135117	1.96513	0.0206536	up
Hsp23	NM_001259765	1.92718	0.0237043	up
tkv	NM_175975	1.85775	0.0269738	up
CG13029	NM_001275046	1.85043	0.00687355	up
RN-tre	NM_001201996	1.84226	0.0219164	up
CG12708	NM_001144727	1.83938	0.0192543	up
CG40298	NM_001043166	1.7843	0.033028	up
key	NM_001259574	1.73724	0.00707621	up
CG10154	NM_001202160	1.73244	0.0252044	up
Ssl2	NM_143399	1.73151	0.00312892	up
Cpr67Fb	NM_140163	1.71439	0.0312886	up
St4	NM_137074	1.70191	0.0468983	up
CG1434	NM_132722	1.68931	4.16984e-06	up
phr6-4	NM_001273703	1.68742	0.0241836	up
CG13397	NM_001273322	1.6766	0.00609593	up
Osi2	NM_001275374	1.67547	8.68008e-05	up
CG31918	NM_135060	1.66214	0.0163262	up
w	NM_057439	1.6538	0.0147087	up
CR13656	NM_143109	1.65306	0.00831825	up
Vm26Ac	NM_135129	1.64116	0.0342131	up
CG13897	NM_001274293	1.63343	0.0125148	up
dpr6	NM_001274744	1.60771	0.0426349	up
cas	NM_001275371	1.59584	0.0306032	up
ntc	NM_139572	1.59202	0.00954987	up
sei	NM_057365	1.56665	0.00711897	up
CR43790	NR_073832	1.55881	0.0243206	up
CG15142	NM_136002	1.54496	0.000409204	up
CG3457	NM_130629	1.54495	0.038294	up
CG18278///CG30059	NM_137028	1.54459	0.0398623	up
CG1529	NM_001144751	1.5354	0.00178723	up
CG13311	NM_140001	1.53293	0.0373141	up
CG4098///CR18217	NM_145191	1.51853	0.0276703	up
CG42825	NM_168396	-4.84816	0.0620832	down	p > 5%
tobi	NM_143134	-2.65976	0.316163	down	p > 5%
CG13658	NM_143117	-2.45974	0.0945531	down	p > 5%
Osi6	NM_141368	-2.36747	0.433405	down	p > 5%
CG9616	NM_142090	-2.28581	0.0663182	down	p > 5%
CG31704	NM_001273468	-2.25028	0.0982264	down	p > 5%
CG32801///Edem1	NM_001258554	-2.14673	0.056359	down	p > 5%
CG30287///CG34166	NM_001103692	-2.07121	0.170107	down	p > 5%
Cyp313a1	NM_142111	-2.04087	0.148036	down	p > 5%
UGP	NM_001169928	-2.03213	0.0992542	down	p > 5%
CG3819	NM_001275098	-1.93394	0.073474	down	p > 5%
CG34034	NM_001170207	-1.91199	0.0927977	down	p > 5%
CG18547	NM_141881	-1.89278	0.0687823	down	p > 5%
CG33470///IM10	NM_165981	-1.89117	0.125453	down	p > 5%
Phae2	NM_135707	-1.87615	0.190479	down	p > 5%
Cyp9b2	NM_078922	-1.87443	0.149654	down	p > 5%
CG16756	NM_131994	-1.85852	0.0950217	down	p > 5%
Cyp12c1	NM_140795	-1.85721	0.087951	down	p > 5%
Drsl5	NM_139546	-1.85285	0.114763	down	p > 5%
mag	NM_140972	-1.83265	0.0938997	down	p > 5%
lectin-37Da///lectin-37Db	NM_001014489	-1.80143	0.274231	down	p > 5%
CG13043	NM_140611	-1.80107	0.348171	down	p > 5%
CG42335	NM_001170209	-1.78961	0.130675	down	p > 5%
CG8534	NM_141698	-1.77699	0.43961	down	p > 5%
CG34330	NM_001103559	-1.77304	0.0665356	down	p > 5%
CG14933///CG42486	NM_001169489	-1.77252	0.0614586	down	p > 5%
CG4563	NM_138069	-1.7614	0.0781382	down	p > 5%
Cyp6d5	NM_142070	-1.74941	0.109124	down	p > 5%
CG16775	NM_140765	-1.74938	0.180546	down	p > 5%
Cpr49Ah	NM_136933	-1.74539	0.128144	down	p > 5%
CG13482	NM_140443	-1.74098	0.166987	down	p > 5%
CG8329	NM_140082	-1.73704	0.0560748	down	p > 5%
CG4835	NM_139708	-1.70267	0.113219	down	p > 5%
arg	NM_001272169	-1.70141	0.105219	down	p > 5%
Obp56e	NM_137601	-1.70137	0.0776692	down	p > 5%
CG5767	NM_137439	-1.69193	0.36496	down	p > 5%
eloF	NM_141699	-1.69142	0.0715931	down	p > 5%
CG13067	NM_140600	-1.67437	0.307513	down	p > 5%
CG10912	NM_137443	-1.66619	0.223494	down	p > 5%
CG3239	NM_131998	-1.66527	0.0528984	down	p > 5%
CG4830	NM_141903	-1.6595	0.0585636	down	p > 5%
Jon25Bii	NM_135038	-1.64719	0.257692	down	p > 5%
CG9812	NM_137949	-1.64599	0.0655057	down	p > 5%
CG5910	NM_001170011	-1.64348	0.135628	down	p > 5%
CG12923///CG30008	NM_001273910	-1.64156	0.0642705	down	p > 5%
CG1648	NM_136674	-1.6415	0.19742	down	p > 5%
CG40198	NM_001015164	-1.63685	0.0981011	down	p > 5%
CG2772	NM_134932	-1.63529	0.0528988	down	p > 5%
CG9468	NM_135409	-1.63443	0.252306	down	p > 5%
CG14275	NM_135367	-1.63247	0.0905821	down	p > 5%
Cyp4ac3	NM_135074	-1.62861	0.113616	down	p > 5%
Mal-B1	NM_135678	-1.62428	0.13436	down	p > 5%
Tsf1	NM_078677	-1.61416	0.293201	down	p > 5%
CG7196	NM_135301	-1.60389	0.0518992	down	p > 5%
Cyp6a20	NM_137158	-1.59322	0.0621641	down	p > 5%
AQP///blw	NM_001169669	-1.59098	0.0817085	down	p > 5%
SPE	NM_142911	-1.58506	0.0927955	down	p > 5%
CG1941	NM_136473	-1.58318	0.114901	down	p > 5%
CG15096	NM_137532	-1.58	0.113831	down	p > 5%
CG31097	NM_170214	-1.57866	0.127048	down	p > 5%
CG10560	NM_143127	-1.57713	0.151784	down	p > 5%
CG31207	NM_169943	-1.57708	0.12451	down	p > 5%
CG31769	NM_165083	-1.57245	0.194059	down	p > 5%
Tsf1	NM_078677	-1.57185	0.194507	down	p > 5%
Obp99a	NM_143450	-1.56768	0.146783	down	p > 5%
Syn	NM_169332	-1.56407	0.054013	down	p > 5%
Cyp4ac2	NM_135073	-1.56252	0.0557227	down	p > 5%
CG6484///DsecCG6484///Jon65Aiii	NM_137390	-1.56224	0.351852	down	p > 5%
CG34331	NM_001103562	-1.56149	0.103333	down	p > 5%
Lip4	NM_001201856	-1.56028	0.0778054	down	p > 5%
CG15213	NM_144202	-1.55816	0.138467	down	p > 5%
Peritrophin-15a	NM_080244	-1.554	0.201642	down	p > 5%
pcl	NM_080291	-1.54983	0.0776247	down	p > 5%
CG12268	NM_001260343	-1.54956	0.125075	down	p > 5%
DNaseII	NM_142415	-1.54843	0.099165	down	p > 5%
Mal-A4	NM_136537	-1.54494	0.383562	down	p > 5%
GstE9	NM_166279	-1.54255	0.176546	down	p > 5%
Obp56g	NM_137603	-1.54255	0.124644	down	p > 5%
CG10680	NM_001273685	-1.54221	0.113348	down	p > 5%
CG6435	NM_137321	-1.54065	0.0947459	down	p > 5%
Ance-5	NM_133164	-1.53887	0.0656317	down	p > 5%
mbl	NM_001144216	-1.5378	0.188709	down	p > 5%
Cyp12a5	NM_142525	-1.53734	0.0984405	down	p > 5%
CG7910///DsecCG7910	NM_141508	-1.53608	0.0669464	down	p > 5%
Jheh3	NM_137543	-1.5352	0.0867588	down	p > 5%
CG31606	NM_164791	-1.53458	0.545477	down	p > 5%
CG18417	NM_139862	-1.53379	0.067718	down	p > 5%
CG3246	NM_134937	-1.53161	0.0997558	down	p > 5%
CG13285	NM_001259709	-1.52951	0.125315	down	p > 5%
Vha100-4	NM_142463	-1.52909	0.230696	down	p > 5%
CG32054	NM_168395	-1.52775	0.311545	down	p > 5%
Cyp28d1	NM_135068	-1.52057	0.379345	down	p > 5%
CG15213	NM_144202	-1.51987	0.158737	down	p > 5%
CG10910	NM_137436	-1.51742	0.226744	down	p > 5%
CG1545	NM_132449	-1.51607	0.0723865	down	p > 5%
CG3814///TTLL3B	NM_001273998	-1.51507	0.232927	down	p > 5%
DptB	NM_079063	-1.51403	0.269494	down	p > 5%
CG11395	NM_137351	-1.51167	0.109202	down	p > 5%
CG9743	NM_143524	-1.51136	0.0852415	down	p > 5%
Ugt86Dc	NM_144368	-1.51036	0.192638	down	p > 5%
CG9466	NM_135408	-1.50994	0.373105	down	p > 5%
CG15347	NM_001201633	-1.50934	0.297825	down	p > 5%
Mal-A2	NM_057277	-1.50632	0.287489	down	p > 5%
CG11796///DsecCG11796	NM_140968	-1.50601	0.283171	down	p > 5%
Smvt	NM_143634	-1.50545	0.0971673	down	p > 5%
CG33494	NM_001276029	-1.50399	0.092732	down	p > 5%
CG9372	NM_140875	-1.50332	0.131232	down	p > 5%
CG5171	NM_001144334	-1.50002	0.212255	down	p > 5%
CG13114	NM_135453	3.97883	0.120446	up	p > 5%
yellow-g	NM_079164	3.70526	0.0838961	up	p > 5%
CG4009	NM_001275726	3.50597	0.0993683	up	p > 5%
yellow-g2	NM_139453	3.27014	0.14922	up	p > 5%
Cp7Fa	NM_001038748	3.2681	0.0589392	up	p > 5%
CG11381	NM_130538	3.18944	0.093291	up	p > 5%
CG15570	NM_131926	3.11932	0.118997	up	p > 5%
Muc4B	NM_167006	2.93541	0.174301	up	p > 5%
Cp38	NM_001169232	2.91232	0.0713536	up	p > 5%
Cp36	NM_078532	2.65895	0.0818626	up	p > 5%
CG12716	NM_132617	2.5408	0.106836	up	p > 5%
CG13083	NM_206005	2.48412	0.0753432	up	p > 5%
CG13084	NM_136127	2.33655	0.104845	up	p > 5%
TotA	NM_080517	2.31908	0.122417	up	p > 5%
Femcoat	NM_080328	2.30012	0.0934565	up	p > 5%
CG32642	NM_167343	2.28921	0.142664	up	p > 5%
CG6508	NM_135613	2.28242	0.109377	up	p > 5%
Cp18	NM_079254	2.28057	0.136214	up	p > 5%
Fbp1	NM_001274897	2.19527	0.315151	up	p > 5%
CG43333	NM_176037	2.19386	0.172858	up	p > 5%
CG31926	NM_001272941	2.17892	0.0837972	up	p > 5%
Cp16	NM_079257	2.13507	0.140391	up	p > 5%
Mur2B	NM_001201595	2.07287	0.180312	up	p > 5%
Mur11Da	NM_167344	2.06742	0.227813	up	p > 5%
CG42335	NM_001170209	2.05483	0.107526	up	p > 5%
Hsp70Aa///Hsp70Ab	NM_080059	2.02419	0.209251	up	p > 5%
Cp19	NM_079256	1.99377	0.120259	up	p > 5%
CG16956	NM_135810	1.98444	0.0911452	up	p > 5%
Lsp2	NM_080077	1.97789	0.51616	up	p > 5%
CG14834	NM_139851	1.97495	0.166748	up	p > 5%
Muc12Ea	NM_167403	1.92338	0.158988	up	p > 5%
Fcp3C	NM_058134	1.92022	0.241067	up	p > 5%
Cp7Fa	NM_001038748	1.89617	0.0666854	up	p > 5%
bam	NM_057452	1.89536	0.0915379	up	p > 5%
Cp7Fc	NM_132257	1.88271	0.360158	up	p > 5%
CG18446	NM_136685	1.84699	0.0553418	up	p > 5%
CG34217	NM_001103759	1.8416	0.622314	up	p > 5%
CG4066	NM_141917	1.79125	0.112895	up	p > 5%
Ir7c	NM_001258643	1.78019	0.0945179	up	p > 5%
Cad74A	NM_001259885	1.77151	0.10756	up	p > 5%
dec-1	NM_001258640	1.73284	0.0961909	up	p > 5%
Obp19c	NM_134548	1.73275	0.301496	up	p > 5%
PH4alphaPV	NM_170516	1.72878	0.104282	up	p > 5%
CG14187	NM_001275158	1.72564	0.174761	up	p > 5%
Spn	NM_001259641	1.71606	0.0801283	up	p > 5%
CG10943	NM_140352	1.71092	0.236839	up	p > 5%
CG13737	NM_140409	1.7107	0.13939	up	p > 5%
Spc105R	NM_001275194	1.69393	0.228895	up	p > 5%
CG31862	NM_165006	1.69084	0.171215	up	p > 5%
CG11504	NM_143501	1.66445	0.0805279	up	p > 5%
CG6425	NM_143240	1.66422	0.23398	up	p > 5%
IntS12	NM_143250	1.65089	0.0600094	up	p > 5%
Fbp2	NM_078798	1.6472	0.417009	up	p > 5%
CG31436	NM_170217	1.62526	0.124334	up	p > 5%
CG31661	NM_164420	1.62321	0.184013	up	p > 5%
mei-217///mei-218	NM_001031897	1.6181	0.115842	up	p > 5%
Cp7Fb	NM_001201634	1.61367	0.405187	up	p > 5%
ana1	NM_143011	1.60702	0.145755	up	p > 5%
CG6283	NM_143267	1.60091	0.164574	up	p > 5%
CG42232	NM_001144588	1.60017	0.194353	up	p > 5%
Cp15	NM_079255	1.58421	0.161825	up	p > 5%
kek5	NM_001258817	1.56974	0.119558	up	p > 5%
RN-tre	NM_001201996	1.56373	0.0968713	up	p > 5%
CG14814	NM_001272216	1.56232	0.192041	up	p > 5%
sti	NM_001274839	1.56218	0.131254	up	p > 5%
wisp	NM_132538	1.5609	0.259153	up	p > 5%
CG11505	NM_139536	1.55047	0.268944	up	p > 5%
Cenp-C	NM_169228	1.5447	0.188448	up	p > 5%
MtnB	NM_079689	1.54147	0.339573	up	p > 5%
CG17129	NM_138204	1.53055	0.157514	up	p > 5%
CG5953///copiaGIP	NM_001169518	1.53001	0.0695166	up	p > 5%
hb	NM_169233	1.52771	0.220923	up	p > 5%
Chd3	NM_140854	1.52172	0.25262	up	p > 5%
Lsp1beta	NM_057276	1.52052	0.569947	up	p > 5%
CG43064	NM_001259797	1.51972	0.17292	up	p > 5%
CG17658	NM_138001	1.51787	0.0853181	up	p > 5%
CG42857	NM_001202277	1.51749	0.0593273	up	p > 5%
pad	NM_142277	1.51474	0.0977439	up	p > 5%
Vm26Ab	NM_057436	1.51134	0.112158	up	p > 5%
Cbp80	NM_001272315	1.50862	0.062527	up	p > 5%
CG17169	NM_001170391	1.50854	0.120659	up	p > 5%
CG15418	NM_134950	1.50656	0.262737	up	p > 5%
Oseg6	NM_137582	1.50589	0.0738725	up	p > 5%
CG7110	NM_135808	1.50555	0.17225	up	p > 5%
CycB3	NM_001276005	1.50248	0.259401	up	p > 5%
CG34449	NM_001103451	1.50201	0.271703	up	p > 5%
Female flies aged 1 d, 5 d and 10 d were pooled for whole-transcriptome analysis, and flies expressing NtFT4 were compared to control flies (da-Gal4 x Oregon-R). We identified 343 deregulated genes (FC > 1.5), 149 of which were significantly deregulated in flies expressing NtFT4. All genes with FC > 1.5 are listed with their accession numbers, sorted by their expression level (downregulated then …
