# Supplementary material for: The tobacco phosphatidylethanolamine-binding protein NtFT4 increases the lifespan of Drosophila melanogaster by interacting with the proteostasis network
Source: Aging (Albany NY). 2022 Apr 8;14(7):2989–3029. doi: 10.18632/aging.204005 (PMC9037272; doi:10.18632/aging.204005)
Supplement: Supplementary Table 6 [file aging-14-204005-s005.xlsx]

## Sheet: PANTHER classif. FC>1.5 p<0.05
Supplementary Table 6. Enrichment analysis of differentially expressed genes in da > NtFT4 flies.
PANTHER classification analysis. The 149 differentially expressed genes were analyzed for enriched functional GO terms (biological processes and protein classes) using the Panther database (http://www.pantherdb.org/). We mapped 97 of the 149 genes and assigned them to nine GO terms representing different biological processes (first spreadsheet, (A). The 25 genes associated with cellular processes…
da > NtFT4 vs. da-Gal4 (FC > 1.5, p > 0.05)
		Input: 149 genes
PANTHER: functional classification
(A)	Biological Process	Mapped genes: 97
		number of deregulated genes	% total	% process hits
	cellular process (GO:0009987)	25	0.258	0.342
	localization (GO:0051179)	4	0.041	0.055
	biological regulation (GO:0065007)	8	0.082	0.11
	reproduction (GO:0000003)	2	0.021	0.027
	response to stimulus (GO:0050896)	5	0.052	0.068
	signaling (GO:0023052)	3	0.031	0.041
	developmental process (GO:0032502)	2	0.021	0.027
	multicellular organismal process (GO:0032501)	4	0.041	0.055
	metabolic process (GO:0008152)	20	0.206	0.274
	ND	24	0.247423
	total process hits:	73
(B)	Cellular process (GO:0009987)	Mapped genes: 25
		number of deregulated genes	% total	% process hits
	cellular component organization or biogenesis (GO:0071840)	2	0.08	0.051
	cell communication (GO:0007154)	3	0.12	0.077
	cell death (GO:0008219)	1	0.04	0.026
	cellular metabolic process (GO:0044237)	19	0.76	0.487
	cellular developmental process (GO:0048869)	1	0.04	0.026
	signal transduction (GO:0007165)	3	0.12	0.077
	cellular homeostasis (GO:0019725)	1	0.04	0.026
	cellular response to stimulus (GO:0051716)	5	0.2	0.128
	transmembrane transport (GO:0055085)	2	0.08	0.051
	protein folding (GO:0006457)	1	0.04	0.026
	process utilizing autophagic mechanism (GO:0061919)	1	0.04	0.026
	total process hits:	39
(C)	Protein class	Mapped genes: 97
		number of deregulated genes	% total	% process hits
	protein modifying enzyme (PC00260)	9	0.093	0.143
	transporter (PC00227)	6	0.062	0.095
	scaffold adaptor protein (PC00226)	4	0.041	0.063
	membrane traffic protein (PC00150)	2	0.021	0.032
	protein-binding activity modulator (PC00095)	5	0.052	0.079
	nucleic acid metabolism protein (PC00171)	3	0.031	0.048
	transmembrane signal receptor (PC00197)	2	0.021	0.032
	defense immunity protein (PC00090)	1	0.01	0.016
	cytoskeletal protein (PC00085)	1	0.01	0.016
	extracellular matrix protein (PC00102)	1	0.01	0.016
	gene-specific transcriptional regulator (PC00264)	2	0.021	0.032
	metabolite interconversion enzyme (PC00262)	27	0.278	0.429
	ND	34	0.350515
	total process hits:	63
(D)	Metabolite interconversion enzyme (PC00262)	Mapped genes: 27
		number of deregulated genes	% total	% process hits
	transferase (PC00220)	9	0.333	0.333
	hydrolase (PC00121)	7	0.259	0.259
	lyase (PC00144)	1	0.037	0.037
	ligase (PC00142)	1	0.037	0.037
	oxidoreductase (PC00176)	9	0.333	0.333
	total process hits:	27
(E)	Protein modifying enzyme (PC00260)	Mapped genes: 9
		number of deregulated genes	% total	% process hits
	protease (PC00190)	8	0.889	0.889
	ubiquitin-protein ligase (PC00234)	1	0.111	0.111

## Sheet: PANTHER List FC>1.5 p<0.05
PANTHER: functional classification - gene list (149 genes total, 97 genes mapped)
Gene ID	UniProtKB	Mapped IDs	Ortholog (Gene Name / Gene Symbol)	PANTHER Protein Class	PANTHER Family / Subfamily
FBgn0051681	Q8IPY7	NM_164473	Peptidase S1 domain-containing protein; DmelCG31681	serine protease(PC00203)	PEPTIDASE S1 DOMAIN-CONTAINING PROTEIN-RELATED (PTHR24276:SF91)
FBgn0031406	Q9VQA0	NM_134818	Peptidase S1 domain-containing protein; Send1	serine protease(PC00203)	PEPTIDASE S1 DOMAIN-CONTAINING PROTEIN-RELATED (PTHR24276:SF91)
FBgn0052523	Q8IQ51	NM_167738	Peptidase S1 domain-containing protein; DmelCG32523	serine protease(PC00203)	PEPTIDASE S1 DOMAIN-CONTAINING PROTEIN-RELATED (PTHR24276:SF91)
FBgn0031741	Q9VMM2	NM_135117	Uncharacterized protein, isoform B; DmelCG11034	serine protease(PC00203)	VENOM DIPEPTIDYL PEPTIDASE 4-LIKE PROTEIN (PTHR11731:SF154)
FBgn0031141	Q9VRD1	NM_134574	Peptidase S1 domain-containing protein; DmelCG1304	serine protease(PC00203)	PEPTIDASE S1 DOMAIN-CONTAINING PROTEIN-RELATED (PTHR24276:SF91)
FBgn0011834	Q9VRD0	NM_078702	Peptidase S1 domain-containing protein; Ser6	serine protease(PC00203)	PEPTIDASE S1 DOMAIN-CONTAINING PROTEIN-RELATED (PTHR24276:SF91)
FBgn0052277	Q8IRE1	NM_168002	Peptidase S1 domain-containing protein; DmelCG32277	serine protease(PC00203)	PEPTIDASE S1 DOMAIN-CONTAINING PROTEIN-RELATED (PTHR24276:SF91)
FBgn0039611	Q9VAS2	NM_143386	Neprilysin-like 18; Nepl18	metalloprotease(PC00153)	FI07649P-RELATED (PTHR11733:SF167)
FBgn0039628	Q9VAQ4	NM_143404	Peptidase S1 domain-containing protein; anon-WO0140519.6		PEPTIDASE S1 DOMAIN-CONTAINING PROTEIN-RELATED (PTHR24260:SF91)
FBgn0035886	Q9VSJ1	NM_168271	Peptidase S1 domain-containing protein; Jon66Ci		FI18411P1-RELATED (PTHR24260:SF134)
Dmel_CG42694	A0A0B4JD89	NM_001202065	Peptidase S1 domain-containing protein; DmelCG42694		MODULAR SERINE PROTEASE-RELATED (PTHR24260:SF136)
FBgn0051205	Q8IN51	NM_169915	Peptidase S1 domain-containing protein; DmelCG31205		INACTIVE SERINE PROTEASE SCARFACE-RELATED (PTHR24260:SF138)
FBgn0037405	Q9VNL6	NM_141360	MIP10102p; anon-f	protease inhibitor(PC00191)	GH09510P-RELATED (PTHR10913:SF45)
FBgn0033574	Q7K508	NM_001169645	SERPIN domain-containing protein; Spn47C	protease inhibitor(PC00191)	ACCESSORY GLAND PROTEIN ACP76A-RELATED (PTHR11461:SF211)
FBgn0024293	A1Z6V5	NM_001032224	SERPIN domain-containing protein; Spn43Ab	protease inhibitor(PC00191)	ACCESSORY GLAND PROTEIN ACP76A-RELATED (PTHR11461:SF211)
FBgn0063923	O97042	NM_001031920	Kazal-like domain-containing protein; Kaz1-ORFB	protease inhibitor(PC00191)	SERINE PROTEASE INHIBITOR KAZAL-TYPE 4 (PTHR21179:SF0)
FBgn0035558	Q9VZA6	NM_001104035	Hexosyltransferase; BcDNA:GM04393	glycosyltransferase(PC00111)	HEXOSYLTRANSFERASE (PTHR11214:SF314)
FBgn0037764	Q4V3H4	NM_141701	Elongation of very long chain fatty acids protein; DmelCG9459	acyltransferase(PC00042)	ELONGATION OF VERY LONG CHAIN FATTY ACIDS PROTEIN-RELATED (PTHR11157:SF116)
FBgn0039030	Q9VCT3	NM_142847	Elongation of very long chain fatty acids protein; DmelCG6660	acyltransferase(PC00042)	ELONGATION OF VERY LONG CHAIN FATTY ACIDS PROTEIN-RELATED (PTHR11157:SF116)
FBgn0037763	Q9VH57	NM_141700	Elongation of very long chain fatty acids protein; DmelCG16904	acyltransferase(PC00042)	ELONGATION OF VERY LONG CHAIN FATTY ACIDS PROTEIN-RELATED (PTHR11157:SF116)
FBgn0034382	Q6NN18	NM_137521	Elongation of very long chain fatty acids protein; CT42569	acyltransferase(PC00042)	ELONGATION OF VERY LONG CHAIN FATTY ACIDS PROTEIN-RELATED (PTHR11157:SF116)
FBgn0063495	A1ZB70	NM_137483	Glutathione S transferase E5; GstE5	transferase(PC00220)	GLUTATHIONE S TRANSFERASE E13, ISOFORM A-RELATED (PTHR43969:SF8)
FBgn0053177	Q86B54	NM_176730	IP20101p; DmelCG33177	transferase(PC00220)	IP20101P-RELATED (PTHR10689:SF6)
FBgn0063491	Q7K8X7	NM_166279	Glutathione S transferase E9; GstE9	transferase(PC00220)	FI01423P-RELATED (PTHR43969:SF4)
FBgn0033887	A1Z9J8	NM_137074	Sulfotransfer_1 domain-containing protein; St4	transferase(PC00220)	SULFOTRANSFER_1 DOMAIN-CONTAINING PROTEIN (PTHR11783:SF274)
FBgn0027073	Q9W2J4	NM_137719	UDP-glucuronosyltransferase; Ugt49B1		UDP-GLUCURONOSYLTRANSFERASE (PTHR48043:SF60)
FBgn0034605	Q9W2J3	NM_001043100	UDP-glucuronosyltransferase; Ugt49C1		UDP-GLUCURONOSYLTRANSFERASE (PTHR48043:SF60)
FBgn0027070	Q9VJ45	NM_136067	UDP-glucuronosyltransferase; Ugt36E1		GLUCURONOSYLTRANSFERASE-RELATED (PTHR48043:SF114)
FBgn0039098	Q9VCK2	NM_142908	GILT-like protein 3; GILT3	reductase(PC00198)	GILT-LIKE PROTEIN 1-RELATED (PTHR13234:SF62)
FBgn0030041	Q9W3F1	NM_132253	RE21057p; 144701_at	reductase(PC00198)	SEPIAPTERIN REDUCTASE (PTHR44085:SF2)
FBgn0015714	Q9V770	NM_143761	Probable cytochrome P450 6a17; Cyp6a17	oxygenase(PC00177)	CYP6A16, ISOFORM B-RELATED (PTHR24292:SF99)
FBgn0015034	Q9V4T5	NM_080032	Probable cytochrome P450 4e1; Cyp4e1	oxygenase(PC00177)	CYTOCHROME P450 4D1-RELATED (PTHR24291:SF143)
FBgn0013772	Q27593	NM_079025	Cytochrome P450 6a8; Cyp6a8	oxygenase(PC00177)	CYP6A16, ISOFORM B-RELATED (PTHR24292:SF99)
FBgn0033982	Q9V776	NM_137160	Probable cytochrome P450 317a1; Cyp317a1	oxygenase(PC00177)	CYP9F3-RELATED (PTHR24292:SF91)
FBgn0033543	Q7JZB1	NM_136759	DAO domain-containing protein; DmelCG12338	oxidase(PC00175)	DAO DOMAIN-CONTAINING PROTEIN (PTHR11530:SF17)
FBgn0023507	Q7K511	NM_130626	FAD-binding PCMH-type domain-containing protein; D2hgdh	dehydrogenase(PC00092)	D-2-HYDROXYGLUTARATE DEHYDROGENASE, MITOCHONDRIAL (PTHR43716:SF1)
FBgn0040705	Q9VR00	NM_144084	Complex I-B8; ND-B8	oxidoreductase(PC00176)	NADH DEHYDROGENASE [UBIQUINONE] 1 ALPHA SUBCOMPLEX SUBUNIT 2 (PTHR12878:SF0)
FBgn0036648	Q9VV83	NM_145191	Nudix hydrolase domain-containing protein; CG4098-PA	hydrolase(PC00121)	ADP-RIBOSE PYROPHOSPHATASE, MITOCHONDRIAL (PTHR13030:SF8)
FBgn0035312	Q9W045	NM_139439	AB hydrolase-1 domain-containing protein; BcDNA:SD08776	hydrolase(PC00121)	AB HYDROLASE-1 DOMAIN-CONTAINING PROTEIN (PTHR43329:SF46)
FBgn0037548	Q9VHV9	NM_001104237	Amidase domain-containing protein; DmelCG7900	hydrolase(PC00121)	AMIDASE DOMAIN-CONTAINING PROTEIN (PTHR43372:SF3)
Dmel_CG1131	A0A0B4K6L1	NM_001260033	Carboxylic ester hydrolase; alpha-Est10	hydrolase(PC00121)	CARBOXYLIC ESTER HYDROLASE (PTHR43142:SF1)
FBgn0013307	P40807	NM_057704	Ornithine decarboxylase 1; Odc1	decarboxylase(PC00089)	ORNITHINE DECARBOXYLASE 1-RELATED (PTHR11482:SF6)
FBgn0012034	Q9VP61	NM_001014599	Acetyl-coenzyme A synthetase; AcCoAS	ligase(PC00142)	ACETYL-COENZYME A SYNTHETASE (PTHR24095:SF244)
FBgn0039769	Q9VA77	NM_143535	Sphingomyelin phosphodiesterase; DmelCG15534	phosphodiesterase(PC00185)	SPHINGOMYELIN PHOSPHODIESTERASE (PTHR10340:SF29)
FBgn0037165	Q9VNU0	NM_141136	acidPPc domain-containing protein; LPP-like	phosphatase(PC00181)	ACIDPPC DOMAIN-CONTAINING PROTEIN-RELATED (PTHR10165:SF103)
FBgn0035697	Q9VRW5	NM_139785	Lipase domain-containing protein; DmelCG10163	lipase(PC00143)	LIPASE DOMAIN-CONTAINING PROTEIN-RELATED (PTHR11610:SF161)
FBgn0034527	Q7JYQ4	NM_137650	DDB1- and CUL4-associated factor 11 homolog; DmelCG9945	ubiquitin-protein ligase(PC00234)	DDB1- AND CUL4-ASSOCIATED FACTOR 11 (PTHR19847:SF7)
FBgn0016054	Q0E8P0	NM_001273703	Photolyase/cryptochrome alpha/beta domain-containing protein; phr6-4	DNA photolyase(PC00014)	PHOTOLYASE/CRYPTOCHROME ALPHA/BETA DOMAIN-CONTAINING PROTEIN (PTHR11455:SF9)
FBgn0051030	Q0KHY8	NM_001043310	Uncharacterized protein, isoform B; CG2176	ATP synthase(PC00002)	AGAP001624-PA (PTHR12471:SF4)
FBgn0029172	Q9VTD4	NM_143709	FA_desaturase domain-containing protein; Fad2		FA_DESATURASE DOMAIN-CONTAINING PROTEIN (PTHR11351:SF31)
FBgn0001217	P11146	NM_079615	Heat shock 70 kDa protein cognate 2; Hsc70-2		HEAT SHOCK 70 KDA PROTEIN COGNATE 2 (PTHR19375:SF496)
FBgn0001224	P02516	NM_001259765	Heat shock protein 23; Hsp23		HEAT SHOCK PROTEIN 22-RELATED (PTHR45640:SF8)
FBgn0031144	B7Z152	NM_001144751	Uncharacterized protein, isoform C; DmelCG1529	C2H2 zinc finger transcription factor(PC00248)	FI01124P-RELATED (PTHR24409:SF406)
FBgn0030899	Q9VWX7	NM_080355	HES-related; Hesr	basic helix-loop-helix transcription factor(PC00055)	ENHANCER OF SPLIT M3 PROTEIN-RELATED (PTHR10985:SF12)
FBgn0050272	Q8MMD6	NM_166564	MFS domain-containing protein; MFS1	secondary carrier transporter(PC00258)	FI21844P1-RELATED (PTHR11662:SF280)
FBgn0086778	E1JJR2	NM_001169324	Nicotinic acetylcholine receptor alpha7, isoform E; nAChRalpha7	ligand-gated ion channel(PC00141)	NICOTINIC ACETYLCHOLINE RECEPTOR ALPHA7, ISOFORM E (PTHR18945:SF799)
FBgn0003353	Q7JPB9	NM_057365	Cyclic nucleotide-binding domain-containing protein; sei	ion channel(PC00133)	CYCLIC NUCLEOTIDE-BINDING DOMAIN-CONTAINING PROTEIN (PTHR10217:SF548)
FBgn0003996	P10090	NM_057439	Protein white; w	ATP-binding cassette (ABC) transporter(PC00003)	PROTEIN WHITE (PTHR48041:SF48)
FBgn0037292	Q9VN75	NM_141254	IP08061p; plh	transporter(PC00227)	IP08061P (PTHR11266:SF26)
FBgn0050269	Q9W217	NM_137860	LITAF domain-containing protein; DmelCG30269	scaffold/adaptor protein(PC00226)	LITAF DOMAIN-CONTAINING PROTEIN (PTHR23292:SF14)
FBgn0052687	Q9W2U2	NM_001272483	RH29237p; CT7080	scaffold/adaptor protein(PC00226)	RH29237P (PTHR45752:SF147)
FBgn0260767	Q9W219	NM_137858	LITAF domain-containing protein; CG13512	scaffold/adaptor protein(PC00226)	LITAF DOMAIN-CONTAINING PROTEIN (PTHR23292:SF6)
FBgn0034655	Q9W2D7	NM_137761	GH17740p; DmelCG10307	scaffold/adaptor protein(PC00226)	GH17740P (PTHR45752:SF158)
FBgn0052475	Q9W0V7	NM_001274253	Probable G-protein coupled receptor Mth-like 8; mthl8	G-protein coupled receptor(PC00021)	G-PROTEIN COUPLED RECEPTOR MTH-RELATED (PTHR47154:SF2)
FBgn0039927	Q9V4A0	NM_143684	FI01405p; DmelCG11155	transmembrane signal receptor(PC00197)	EYE-ENRICHED KAINATE RECEPTOR, ISOFORM B-RELATED (PTHR18966:SF422)
FBgn0030554	Q9VY45	NM_132722	DRBM domain-containing protein; DmelCG1434	RNA processing factor(PC00147)	TRNA-DIHYDROURIDINE(20) SYNTHASE [NAD(P)+]-LIKE (PTHR45936:SF1)
FBgn0031224	Q9VPK4	NM_134653	RRM domain-containing protein; dRbm7	nucleic acid metabolism protein(PC00171)	RRM DOMAIN-CONTAINING PROTEIN (PTHR13798:SF11)
FBgn0016675	Q9VIX1	NM_001201916	C-type lectin domain-containing protein; Lectin-galC1	membrane traffic protein(PC00150)	C-TYPE LECTIN 37DA-RELATED (PTHR22802:SF437)
FBgn0031373	Q9VQ53	NM_134785	C-type lectin domain-containing protein; mdcds_4396	membrane traffic protein(PC00150)	C-TYPE LECTIN 37DB-RELATED (PTHR22802:SF396)
FBgn0036110	Q9VTC8	NM_140163	Cuticular protein 67Fb; Cpr67Fb	extracellular matrix structural protein(PC00103)	CUTICULAR PROTEIN 67FB (PTHR10380:SF216)
FBgn0032645	Q9VJC8	NM_136002	Uncharacterized protein; DmelCG15142	kinase inhibitor(PC00139)	CDK2-ASSOCIATED PROTEIN 1, ISOFORM B (PTHR22607:SF3)
FBgn0038115	Q9VFZ4	NM_141999	Uncharacterized protein; DmelCG7966	defense/immunity protein(PC00090)	METHANETHIOL OXIDASE (PTHR23300:SF0)
FBgn0035656	M9PEA4	NM_001274529	SH2 domain-containing protein; DmelCG10479	non-motor actin binding protein(PC00165)	SH2 DOMAIN-CONTAINING PROTEIN (PTHR45734:SF7)
Dmel_CG42573	A0A0B4KFU1	NM_001275600	2mit, isoform B; 2mit		2MIT, ISOFORM B-RELATED (PTHR45617:SF130)
FBgn0039670	Q9VAK3	NM_143442	DUF725 domain-containing protein; BcDNA:RE47447		DUF725 DOMAIN-CONTAINING PROTEIN-RELATED (PTHR48233:SF1)
FBgn0037782	Q9VH32	NM_141718	ML domain-containing protein; Npc2d		ML DOMAIN-CONTAINING PROTEIN (PTHR11306:SF36)
FBgn0039755	Q9VA93	NM_143523	FA_desaturase domain-containing protein; DmelCG15531		FA_DESATURASE DOMAIN-CONTAINING PROTEIN (PTHR11351:SF26)
FBgn0040609	Q9VB45	NM_144004	Chitin-binding type-2 domain-containing protein; DmelCG3348		CHITIN-BINDING TYPE-2 DOMAIN-CONTAINING PROTEIN-RELATED (PTHR20987:SF0)
FBgn0039298	Q9VBV3	NM_079773	Protein takeout; to		CIRCADIAN CLOCK-CONTROLLED PROTEIN DAYWAKE-RELATED (PTHR11008:SF32)
FBgn0041780	Q9VAQ9	NM_143399	Adipocyte plasma membrane-associated protein; Ssl2		ADIPOCYTE PLASMA MEMBRANE-ASSOCIATED PROTEIN (PTHR10426:SF99)
FBgn0035461	Q8SX86	NM_139572	Protein nutcracker; ntc		F-BOX ONLY PROTEIN 7 (PTHR15537:SF2)
FBgn0039316	Q9VBT2	NM_143118	CHK domain-containing protein; DmelCG11893		CHK DOMAIN-CONTAINING PROTEIN (PTHR11012:SF12)
FBgn0036619	Q9VV46	NM_140627	Cuticular protein 72Ec; Cpr72Ec		CUTICULAR PROTEIN 72EA-RELATED (PTHR12236:SF8)
Dmel_CG11825	A0A0B4KEI1	NM_001273936	HIG1 domain-containing protein; DmelCG11825		HIG1 DOMAIN-CONTAINING PROTEIN (PTHR12297:SF6)
FBgn0032601	Q9VJI5	NM_078862	LD43175p; yellow-b		LD43175P (PTHR10009:SF12)
FBgn0036361	Q9VU72	NM_001202160	Uncharacterized protein, isoform A; DmelCG10154		GH09355P-RELATED (PTHR23301:SF85)
FBgn0039118	Q9VCH7	NM_142929	DUF1989 domain-containing protein; DmelCG10208		DUF1989 DOMAIN-CONTAINING PROTEIN (PTHR31527:SF0)
FBgn0014417	Q9VLL5	NM_001273322	LP03571p; ESTS:172F5T		ALPHA-N-ACETYLGLUCOSAMINIDASE (PTHR12872:SF1)
FBgn0027111	Q9W0S5	NM_001274268	Midkine and pleiotrophin 1, isoform A; miple1		MIDKINE AND PLEIOTROPHIN 1, ISOFORM A-RELATED (PTHR21050:SF1)
FBgn0034517	Q7K5J8	NM_001144249	Cuticular protein 57A, isoform A; Cpr57A		CUTICULAR PROTEIN 57A, ISOFORM A (PTHR12236:SF7)
FBgn0039591	Q9VAU4	NM_143368	FI09337p; DmelCG9988		FI02830P-RELATED (PTHR10974:SF9)
FBgn0037410	Q9VNM3	NM_001275374	LP14110p; Osi2		LP14110P (PTHR21879:SF10)
FBgn0034480	A1ZBR1	NM_137608	CHK domain-containing protein; DmelCG16898		CHK DOMAIN-CONTAINING PROTEIN (PTHR11012:SF13)
FBgn0051157	Q8INH8	NM_001104299	Uncharacterized protein, isoform C; DmelCG31157		TMEM135_C_RICH DOMAIN-CONTAINING PROTEIN (PTHR12459:SF15)
FBgn0051380	Q8IMS4	NM_170242	CHK domain-containing protein; DmelCG31380		CHK DOMAIN-CONTAINING PROTEIN (PTHR11012:SF13)
FBgn0004429	P29615	NM_057480	Lysozyme P; LysP		GLYCOSYL_HYDROL_F22_1 DOMAIN-CONTAINING PROTEIN-RELATED (PTHR11407:SF36)
FBgn0031057	Q9VWD9	NM_134500	LD38919p; Ubqn		FI07626P-RELATED (PTHR10677:SF3)
