# Supplementary material for: The tobacco phosphatidylethanolamine-binding protein NtFT4 increases the lifespan of Drosophila melanogaster by interacting with the proteostasis network
Source: Aging (Albany NY). 2022 Apr 8;14(7):2989–3029. doi: 10.18632/aging.204005 (PMC9037272; doi:10.18632/aging.204005)
Supplement: Supplementary Table 7 [file aging-14-204005-s006.xlsx]

## Sheet: Supplementary Table 7
Supplementary Table 7. List of all primers used for cloning and gene expression analysis.
Intended use	ID	Sequence
Overexpression in planta
RKIP	RKIP XhoI for	AAACTCGAGATGCCGGTGGACCTCAGC
	RKIP XbaI rev	AAATCTAGACTACTTCCCAGACAGCTGCTCG
hPEBP4	hPEBP4 for SalI	AGAGTCGACAACAATGGGTTGGACAATGAGGC
	hPEBP4 rev XbaI	AGATCTAGACTAGCAGGCAGCTATCTCCG
CG7054	CG7054 for XhoI	AGACTCGAGATGGATGACATAGTACCCG
	CG7054+ rev XbaI	AAATCTAGACTAGCCTACGATCGTTTTATTC
CG7054-ds SOE-PCR	CG7054 SOE-EVYN for	GAAGTTTACAATTTGGGCGAGCCCATTGC
	CG7054 SOE-EVYN rev	ATTGTAAACTTCGGCAAAGTCCCGGGCGTTGAAG
	CG7054 SOE-YAPGW for	TTGGGTCGCGAAACTGTGTATGCACCAGGTTGGCGTCAAAACTTCAACGCCCGGGAC
	CG7054 SOE-YAPGW rev	TTGACGCCAACCTGGTGCATACACAGTTTCGCGACCCAACTGGCGATAGAGGAGGAA
PEBP1	dmPEBP1 for XhoI	AGACTCGAGAACAATGGACACCGCCGGCATTAT
	dmPEBP1 rev XbaI	AGATCTAGATTACTGGACCGTCTCGATGAGG
NtFT4	NtFT4 for XhoI	AGACTCGAGAACAATGCCAAGAATAGATCCTTTG
	NtFT4 rev XbaI	AGATCTAGATTAATATGCGCGGCGGC
NtFT2	NtFT2 for XhoI	AGACTCGAGAACAATGTTAAGAGCAAATCCTTTAG
	NtFT2 rev XbaI	AGATCTAGATTATAGGTGACGGCCACC
Overexpression Drosophila
CG7054	CG7054 for NcoI	AGACCATGGATGACATAGTACCCG
	CG7054 rev XhoI	AGACTCGAGCTAGCCTACGATCGTTTTATTC
NtFT4	NtFT4 for SalI	AGAGTCGACATGCCAAGAATAGATCCTTTG
	NtFT4 rev XhoI	AGACTCGAGTTAATATGCGCGGCGG
NtFT4-3xHA	NtFT4- rev XhoI	AGACTCGAGTAATATGCGCGGCGGC
NtFT2	NtFT2 for PciI	AGAACATGTTAAGAGCAAATCCTTTAG
	NtFT2 rev XhoI	AGACTCGAGTTATAGGTGACGGCCACC
NtFT2-3xHA	NtFT2- rev XhoI	AGACTCGAGTATAGGTGACGGCCACC
Expression S2/HEK cells
HA-NtFT2	HA-NtFT2 for SpeI	AAAACTAGTATGTACCCCTACGATGTCCCTGACTACGCTATGTTAAGAGCAAATCCTTTAG
HA-NtFT4	HA-NtFT4_coDM for SpeI	AAAACTAGTATGTACCCCTACGATGTCCCTGACTACGCTATGCCCCGCATCGATC
	NtFT4_coDM rev XhoI	AAACTCGAGTTAGTAGGCGCGGCGG
HA-CG7054	HA-CG7054 for SpeI	AAAACTAGTATGTACCCCTACGATGTCCCTGACTACGCTATGGATGACATAGTACCCG
HA-PEBP1	HA-PEBP1 for SpeI	AAAACTAGTATGTACCCCTACGATGTCCCTGACTACGCTATGGACACCGCCGGCATTAT
HA-EGFP-constructs	HA-EGFP for SpeI	AAAACTAGTATGTACCCCTACGATGTCCCTGACTACGCTATGGTGAGCAAGGGC
	EGFP- rev XhoI	AAACTCGAGCTTGTACAGCTCGTCCATG
	EGFP for SpeI	AAAACTAGTATGGTGAGCAAGGGC
	EGFP for NcoI	AAACCATGGTGAGCAAGGGC
	EGFP-HA rev XhoI	AAACTCGAGTTAAGCGTAGTCAGGGACATCGTAGGGGTACTTGTACAGCTCGTCCATG
HA-EGFP-NtFT4	NtFT4_coDM for XhoII	AAAACTCGAGATGCCCCGCATCGATC
	NtFT4_coDM rev ApaI	AAAGGGCCCTTAGTAGGCGCGGCGG
HA-EGFP-CG6180	CG6180 for XhoI	AGACTCGAGATGATTTGTATGCGGCTCCG
	CG6180 rev ApaI	AGAGGGCCCCTAAGCGCCCAGCTGCTT
HA-EGFP-CG10298	CG10298 for XhoI	AGACTCGAGATGTCCGATTCCACCGT
	CG10298 rev ApaI	AGAGGGCCCCTACTTCTTGCCAGATAGTTGC
HA-EGFP-CG17917	CG17917 for XhoI	AGACTCGAGATGCGATTCGCGCC
	CG17917 rev ApaI	AGAGGGCCCTCAAAAGTGTGCTACTTGACG
HA-EGFP-CG17919	CG17919 for XhoI	AGACTCGAGATGCTGCGAGTGCTACTGC
	CG17919 rev ApaI	AGAGGGCCCTCAATTCTCCGAAAGTTGCTTG
HA-EGFP-PEBP1	PEBP1 for XhoI	AGACTCGAGATGGACACCGCCGG
	PEBP1 rev ApaI	AGAGGGCCCTTACTGGACCGTCTCGATGA
myc-mRFP-constructs	cmyc_mRFP for KpnI	AAAGGTACCATGGAGCAAAAACTTATATCCGAGGAGGATCTTATGGCCTCCTCCGAG
	mRFP- rev XhoI	ACACTCGAGGGCGCCGGTGGA
myc-mRFP-H2AZ	H2AZ for XhoI	ACACTCGAGATGGCTGGCGGTAAGG
	H2AZ rev XbaI	ACATCTAGACCAGGCATCCTTTAGACAGTC
qRT-PCR
Reference gene	dmGAPDH2 for	CGTTCATGCCACCACCGCTA
	dmGAPDH2 rev	CCACGTCCATCACGCCACAA
Reference gene	dm14-3-3ε for	CATGAACGATCTGCCACCAAC
	dm14-3-3ε rev	CTCTTCGCTCAGTGTATCCAAC
Reference gene	dmRpL32 for	AAGCGGCGACGCACTCTGTT
	dmRpL32 rev	GCCCAGCATACAGGCCCAAG
GOI	2mit for	ACGGATGAACGAGGAAATGA
	2mit rev	GATCACAGTGTTGGTTCACG
GOI	α-Est10 for	TCGGGTTTATTGTGACACTT
	α-Est10 rev	AGTGCAATCCAATTCCTGAT
GOI	CG10163 for	ATGAGAGCACAATTCACCAT
	CG10163 rev	GCATTCACATAGATGAGGGT
GOI	CG1304 for	TGTCCAGGAACTACGTCTTA
	CG1304 rev	GACTTCAGGGTGTTGTACTG
GOI	CG31205 for	GACGATGTGGTCTCGTAAG
	CG31205 rev	CTTTGAAACACAGTGAGCTG
GOI	CG31681 for	ACTTGGTGGCACTGTAAAGAA
	CG31681 rev	GCCAGGATTTGTACCACAAC
GOI	CG32277 for	GTCGGCCTATCACCAAACTA
	CG32277 rev	ACTGATTTGATGCACTCCCT
GOI	CG32523 for	CAATTTCCGCACCAGATTT
	CG32523 rev	ATAACTTCGGCCACTGGAAT
GOI	CG42825 for	AAACCTCAATCCAATGCTGT
	CG42825 rev	TCCATTATTGTGGGTGCAG
GOI	CG4302 for	CATTTCCAAAACGGTGTTCTT
	CG4302 rev	AGTTGGCAAATCTGTCATTTC
GOI	CG11825 for	CCAATTCTCTATTCGAAACCGAC
	CG11825 rev	TATTGCTTTTCGGTTCCTCG
GOI	CG12057 for	CAACTCGTACAAGAACTCCG
	CG12057 rev	AGTTTGTGTTCACCTAGCGA
GOI	CG13422 for	TGGCGCAAAACTCAAAGT
	CG13422 rev	ATCGCTCAGATCGTCCATT
GOI	CG13822 for	TTGGGCTACTGTTTACCCTG
	CG13822 rev	AATAATGCAGGCATGGAGTG
GOI	CG14406 for	CGAGGATGTGATAACAGGAA
	CG14406 rev	CAGTTTTTATCGCTCCGAAA
GOI	CG14410 for	CCAATGAAGAGCAGTACGTC
	CG14410 rev	AGGAGGCATAGGATTCGAC
GOI	CG15570 for	TCATCTGGTGTGGGAAACA
	CG15570 rev	TGAAGACCCAGAAGATCCG
GOI	CG15571 for	AATAGGGATCATCACTTCGC
	CG15571 rev	GTATTTTCGCTATCCTCCGT
GOI	CG15820 for	GCTGATAGACCCATTTTGGC
	CG15820 rev	CCCTCGGTATGATGAACACA
GOI	CG16898 for	ATTTCCTAGTCTCCAGGGGTT
	CG16898 rev	ACCCTTTCGTTGGCATAGAT
GOI	CG17322 for	GGTTGTTGGAAGGTTTTCTG
	CG17322 rev	TCCTCTCTTCCCATTTTGTG
GOI	CG17478 for	ATTAATGGTCCGCTGTTTCT
	CG17478 rev	GGTGTAGGTAAATGGCTTCA
GOI	CG2022 for	GCACCGACATTAAGTCATCG
	CG2022 rev	GTAAACACGACCTGGTTTCG
GOI	CG30272 for	ATATAAGCAGTGCGCGGATA
	CG30272 rev	TGTGTCAGTATGTAGCCCCAA
GOI	CG7837 for	CAACATGCAACACCATTGAC
	CG7837 rev	CTCCTCCTTGCCATAATTCG
GOI	CG9945 for	GCAATATGCGTAATCGCAGT
	CG9945 rev	AGACACGATTTCTGAGCGAT
GOI	Cyp313a1 for	ACACTCACAGAAATCCCGAA
	Cyp313a1 rev	CCTTGTAGAGAGTGCTTGTGCT
GOI	Cyp6a17 for	TTTAACGAACTTCTCGCTCA
	Cyp6a17 rev	TTCTGGCTTGAATATCTCCG
GOI	DnaJ-1 for	CGCAAACTGGCACTCAAATA
	DnaJ-1 rev	CCGTGGAACTGGTAAGTGTAC
GOI	dpr6 for	AAGGCAGCACCATAAATCTC
	dpr6 rev	CAGAGGATGGCAACAATTTC
GOI	Drsl4 for	GGATTGTTTGCTCTCCTCG
	Drsl4 rev	GTGTCAAACATATTGGACGATG
GOI	Fad2 for	ATCTCATCTGGACGGTCAAT
	Fad2 rev	GACCAAATCCAGTGAGACAC
GOI	GstD1 for	CCAGGTGTATTTGGTGGAGA
	GstD1 rev	CTTCTTGAAGGCCTCTGGAT
GOI	GstD3 for	AAAGGTCCAGGAGACTTTCG
	GstD3 rev	GTTTTCTTCCCATCCAGGG
GOI	GstD9 for	ATCCTCAGCATACGATTCCC
	GstD9 rev	ATCAGCTGGCTTCTTCACAT
GOI	GstE3 for	AACAAGACGGAGATTCCACA
	GstE3 rev	TTCGCTTCCTCGTAGTATGG
GOI	GstE5 for	AGATTCGGATGCCCTGTAT
	GstE5 rev	GTAATCGACGAGATCAGGCT
GOI	GstE7 for	ATTACCAAGCCACTTTTCGC
	GstE7 rev	TTACGAAGACCTCCAACGAG
GOI	GstE8 for	GCTGATTTTGTACGGGACAG
	GstE8 rev	AAATGGCCATCGTCCTCTA
GOI	GstE9 for	AGCCATTCCGTTGTTCTACA
	GstE9 rev	CCGTTTAACTTGGGATAGCG
GOI	GstE10 for	TCAACCAGCTAGAAGGCAAT
	GstE10 rev	AATGCATGACTCACCATCCT
GOI	Hsc70-3 for	CACTTTGAAGCGTCGAGAAA
	Hsc70-3 rev	GAATACGTGGTGCCCAAATC
GOI	Hsc70-4 for	GTGCGGCAGATTAAAAGTGA
	Hsc70-4 rev	AGGCAACATAGGATGGAGTG
GOI	Hsp22 for	AATGCGTTCCTTACCGATG
	Hsp22 rev	TCCAGCACCTTGACCTTTAG
GOI	Hsp23 for	TATGAGCCCTACTACTGCCAG
	Hsp23 rev	AGTTGTCCTGCACTTTGACC
GOI	Hsp26 for	AGGATGGATTCCAGGTGTG
	Hsp26 rev	CTTGGGAATACTGACGGTGA
GOI	Hsp27 for	TTTGTGCGCAAGTATACCCT
	Hsp27 rev	TGCTAGTCTCCATTTTCTCGC
GOI	Hsp68 for	CCAGTACGGAAAAGTGGAGA
	Hsp68 rev	ACGCTTATCTTTGGTTTGCC
GOI	Hsp70Aa for	GGAGGATTTGGAGGCTACTC
	Hsp70Aa rev	CGATCGAAACATTCTTATCAGTC
GOI	Hsp83 for	TAACAACAAGCAGCGTCTGA
	Hsp83 rev	AGTAAGGGACTCATAGCGGATC
GOI	HspB8 for	CCGAGGCTAACAAGAGGAAT
	HspB8 rev	GTCGGAGACGTAGTTCTGTTG
GOI	l(2)efl for	GGAAAGCATGAGGAGAAGC
	l(2)efl rev	ACACTGAAGGCGGTACAAAA
GOI	Jon66Ci for	TTTCTGCAACATGAAGGTGT
	Jon66Ci rev	ACTCGTTGGAGATGATGGAG
GOI	l(2)03659 for	TATGGACAAGCAACCTGTTT
	l(2)03659 rev	GGTCTATAGAGGTCCGTTGA
GOI	Lectin-galC for	GATGGACTCGCGAAAAGTT
	Lectin-galC rev	GTTTCGAATGTGACCAGCTC
GOI	LysP for	CTACGGCATCTTTCAGATCA
	LysP rev	ACTGGCTATTGTTCGACTTT
GOI	Nop60B for	TGTTTGTATTGACAGGGCC
	Nop60B rev	CATGGTACGGATGTAGGAGC
GOI	Npc2d for	TCCCATTGGTGAATATCCC
	Npc2d rev	GAGCTCAGCGATGGATTTT
GOI	Odc1 fev	GCAGTTGAAGGACCCATAGA
	Odc1 for	ATCAAGAAGGCCAAGAACCT
GOI	sei for	TATTTGCGTGATGCTCGTT
	sei rev	CATGTCGATGCCATTCGTA
GOI	Ser6 for	CTGTGGAGGTTCAATTCTGA
	Ser6 rev	CCTGGTTATCGACTTTAGGG
GOI	Spn47C for	GATTTCGGAGGCTAGACACA
	Spn47C rev	ATGGCCAACGAAGTAAACG
GOI	tkv for	GTTTTCGGTGTAAATGTGGTT
	tkv rev	CTCATCGTAAAGCTGTTGGAC
BiFC
14-3-3 c	14-3-3 c for NcoI	AAACCATGGCGGTGGCACCG
	14-3-3 c rev XhoI	AAACTCGAGCCTTCAATTTTTGGCTTCATCAGG
Act42A	Act42 for PciI	AAAACATGTGTGACGAAGAGGTTGC
	Act42A rev XhoI	AAACTCGAGTTAGAAGCACTTGCGGTGAAC
	Act42A rev- XhoI	AAACTCGAGTAGAAGCACTTGCGGTGAAC
CG6523	CG6523 for	ATGCCCGTGGTGAACGT
	CG6523 rev SalI	AAAGTCGACTTAGCCCTTTAGCGTGGACTC
	CG6523- rev SalI	AAAGTCGACAAGCCCTTTAGCGTGGACTC
CG7220	CG7220 for EcoRI	AAAGAATTCATGTCTTCGAAGTCGCCAA
	CG7220 rev XhoI	AAACTCGAGCTAAACAGAATCATCGTGGTACCA
	CG7220 rev- XhoI	AAACTCGAGTAAACAGAATCATCGTGGTACCA
CKIIα-i3	CkIIalpha-i3 for EcoRI	AAAGAATTCATGGAAAAGGAATCCAATTTATCG
	CkIIalpha-i3 rev XhoI	AAACTCGAGTCATAGATCGAAATCCTCGTTCT
mRpL44	mRpL44 for EcoRI	AAAGAATTCATGTCATTCTTACGCAGTGCTG
	mRpL44 rev XhoI	AAACTCGAGTCAGCCAAGTCGCACG
	mRpL44 rev- XhoI	AAACTCGAGCAGCCAAGTCGCACG
Rheb	Rheb for EcoRI neu	AAAGAATTCATGCCAACCAAGGAGC
	Rheb rev XhoI	AAACTCGAGCTACGATACAAGACAACCGCTCTT
	Rheb rev- XhoI	AAACTCGAGTACGATACAAGACAACCGCTCTT
Yippee	Yippee for EcoRI	AAAGAATTCATGGGACGCATTTTCTTG
	Yippee rev XhoI	AAACTCGAGTCAATGACTCGTGGTGGC
	Yippe rev- XhoI	AAACTCGAGCAATGACTCGTGGTGGC
CG4364	CG4364 for SalI	AAAGTCGACATGAGACGACCCAAGAAGTAC
	CG4364- rev NotI	AAAGCGGCCGCCACTTGCCCAGCTTGG
	CG4364+ rev NotI	AAAGCGGCCGCTCACTTGCCCAGCTTG
CCT7	CCT7 for NcoI	AAACCATGGCAATGCAACCGCAAATCGT
	CCT7- rev XhoI	AAACTCGAGTACATGGGCCTGCCC
	CCT7+ rev XhoI	AAACTCGAGTTACATGGGCCTGCCC
Df31	Df31 for NcoI	AAACCATGGCTGATGTGGCTGAG
	Df31 rev XhoI	AAACTCGAGTTAGGCGGCCACTTCG
	Df31- rev XhoI	AAACTCGAGTAGGCGGCCACTTCG
Hsp26	Hsp26 for SalI	AAAGTCGACATGTCGCTATCTACTCTGCTTTC
	Hsp26- rev NotI	AAAGCGGCCGCAACTTGTCCTTGCCGTTG
	Hsp26+ rev NotI	AAAGCGGCCGCTTACTTGTCCTTGCCGTTG
p47	p47 for NcoI	AAACCATGGCAGCTCGTGGTG
	p47 for XhoI	AAACTCGAGATGGCAGCTCGTGGTG
	p47- rev XhoI	AAACTCGAGTACTTGAGGCGCTGCAT
Pen	Pen for XhoII	AAACTCGAGATGAGTAAGGCGGATTCTAACT
	Pen rev NotI	AAAGCGGCCGCTTAGAACGTGTAGCCACCTTC
	Pen- rev NotI	AAAGCGGCCGCAAGAACGTGTAGCCACCTTC
PyK	PyK for SalI	AAAGTCGACATGGTGAACGTAACCATCTACG
	PyK+ rev NotI	AAAGCGGCCGCTTATTCGACGGTGACAATGC
	PyK- rev NotI	AAAGCGGCCGCAATTCGACGGTGACAATGC
Tsn	Tsn for NcoI	AAACCATGGCAACAGCAGCGAA
	Tsn rev XhoI	AAACTCGAGTTAGCGGAACTCGGGC
	Tsn- rev XhoI	AAACTCGAGTAGCGGAACTCGGGCG
Y2H
4E-T	4E-T for EcoRI	AAAGAATTCATGGATACATCAAAGATTAGTGC
	4E-T rev BamHI	AAAGGATCCTTAGTTATGCACGACGCCT
Act42A	Act42A for EcoRI	AAAGAATTCATGTGTGACGAAGAGGTTGC
Akh	Akh for EcoRI	AAAGAATTCATGAATCCCAAGAGCGAAGTC
	Akh rev SalI	AAAGTCGACCTACTCGCGGTGCTTGC
Aqrs	Aqrs for NdeI	AAACATATGCGACTCCTATTCACATGC
	Aqrs rev SalI	AAAGTCGACCTAATAATAATCGAGAACGCTTT
Cals	Cals for EcoRI	AAAGAATTCATGACGTTTCACAAAACC
	Cals rev XhoI	AAACTCGAGTTACTGTTGGAAAATATTAGAGTT
CG11148	CG11148 for EcoRI	AAAGAATTCATGACAGATTCAATGAAATTTGG
	CG11148 rev XhoI	AAACTCGAGTTATGGTCCTTCGACGTAGTCT
CG13775	CG13775 for NdeI	AAACATATGTGGACATCCGCAAAA
	CG13775 rev SalI	AAAGTCGACCTAATTGATTTCCGAATTGCTAAAG
CG31644	CG31644 for EcoRI	AAAGAATTCATGCCCGAAGAAAAGTTTAAGTTT
	CG31644 rev XhoI	AAACTCGAGCTATTTCTTCTTCTTGTCATCCTTTTTG
CG3303	CG3303 for EcoRI	AAAGAATTCATGGACGCAGTGCAGC
	CG3303 rev XhoI	AAACTCGAGCTAGGAGCTGTCCGGATAGAC
CG5028	CG5028 for EcoRI	AAAGAATTCATGGCCCTTCGCTTGAC
	CG5028 rev XhoI	AAACTCGAGTTACCAATTCACGCGCTT
CG6523	CG6523 for EcoRI	AAAGAATTCATGCCCGTGGTGAACGT
Cyp12a4	Cyp12a4 for NdeI	AAACATATGCTAAAAGTTCGCAGTGC
	Cyp12a4 rev SalI	AAAGTCGACTTAGTTTGGTAAATCGATGAATTTAA
Cyp6a9	Cyp6a9 for NdeI	AAACATATGGGCAGCCTGACG
	Cyp6a9 rev XhoI	AAACTCGAGTTAAACGCGTTCAACTTTTAAGAAG
DhpD	DhpD for EcoRI	AAAGAATTCATGGCAACCGTGTTTCTT
	DhpD rev XhoI	AAACTCGAGTCATTGGTATCCCTGTTTAATACG
dpr7	dpr7 for EcoRI	AAAGAATTCATGTCGCGTGGCAAAC
	dpr7 rev BamHI	AAAGGATCCTCATCTTTCTCTTAGATACATATGCTC
Eip55E	Eip40 for EcoRI	AAAGAATTCATGAGCTACAGAGTCCAGCC
	Eip40 rev XhoI	AAACTCGAGTTAGGCCTTCGATGCAAT
idgf3	idgf3 for EcoRI	AAAGAATTCATGACTGGCTCTCTTTGGCT
	idgf3 rev SalI	AAAGTCGACTTAGAGAAGTCGATACTTGATGGC
ms(3)76Ba	ms(3)76Ba for	AATGCCACGACCTTCGAT
	ms(3)76Ba rev SacI	AAAGAGCTCTTAGTCTACTATTTCCTTTTTGATG
Nplp4	Nplp4 for EcoRI	AAAGAATTCATGTTCAAGCTGCTGGTTGT
	Nplp4 rev XhoI	AAACTCGAGTTAGCCGTAGTAGGAGTAGGGC
Nrev2	Nrev2,2 forEcoRI	AAAGAATTCATGCCTACCATAACCGAGGATT
	Nrev2,2 rev XhoI	AAACTCGAGTTAATCAATGAGGAGCTCATAGTGC
Nrev3	Nrev3 for EcoRI	AAAGAATTCATGGCCGATAAAAAAATTGG
	Nrev3 rev XhoI	AAACTCGAGTTAATCAACCATCAACTCGAA
Pex3	PeroxinA for NdeI	AAACATATGCTGTCGCGCCTG
	PeroxinA rev	CTAAGCGGAGCTAAAGCTTTC
pkaap	pkaap for EcoRI	AAAGAATTCATGTTAAATTACATCAAGAGGCACG
	pkaap rev XhoI	AAACTCGAGTCAGGCCAGCGGAGG
Rpp20	Rpp20 for NdeI	AAACATATGATGGGAAGCAATTATCC
	Rpp20 rev XhoI	AAACTCGAGCTACTGCCTGGCCTTCG
RpS10b	RpS10b for EcoRI	AAAGAATTCATGTTTATGCCAAAGGCCC
	RpS10b rev XhoI	AAACTCGAGTTAGTCGCGCGATCCG
vdup1	Vdup1 for NdeI	AAACATATGCCGCGCAAGTTG
	Vdup1 rev XhoI	AAACTCGAGCTATGCCTCGATAGGCTTCTC
wech	wech for EcoRI	AAAGAATTCATGATGGAACTTTTGTCAAACA
	wech rev BamHI	AAAGGATCCTTAGAATACGTGCACAAACCG
ε-Try	Try for EcoRI	AAAGAATTCATGTTGAAATTCGCGGTACTT
	Try rev XhoI	AAACTCGAGTTACACCTCCTCGGCG
14-3-3ζ	14-3-3ζ for EcoRI	AAAGAATTCATGTCGACAGTCGATAAGGA
	14-3-3ζ rev XholI	ACACTCGAGTTAGTTGTCGCCGCC
Co-IP
14-3-3ζ	myc-14-3-3ζ for SpeI	AAAACTAGTATGGAGCAAAAACTTATATCCGAGGAGGATCTTATGTCGACAGTCGATAAGGAA
	14-3-3ζ rev XhoI	AAACTCGAGTTAGTTGTCGCCGCCC
Cbs	myc-Cbs for EcoRI	AAAGAATTCATGGAGCAAAAACTTATATCCGAGGAGGATCTTATGCCACAACCGAAGC
	Cbs rev XbaI	AAATCTAGATTAGTGGCTGCCGCC
CCT2	myc-CCT2 for EcoRI	AAAGAATTCATGGAGCAAAAACTTATATCCGAGGAGGATCTTATGGAGATGTCCTTGAATCC
	CCT2 rev XbaI	AAATCTAGACTAGCAGTAGCCCCTGTCG
CCT7	myc-CCT7 for SpeI	AAAACTAGTATGGAGCAAAAACTTATATCCGAGGAGGATCTTATGCAACCGCAAATCGT
	CCT7 rev XhoI	AAACTCGAGTTACATGGGCCTGCCC
CG4364	myc-CG4364 for SpeI	AAAACTAGTATGGAGCAAAAACTTATATCCGAGGAGGATCTTATGAGACGACCCAAGAAGTAC
	CG4364 rev XhoI	AAACTCGAGTCACTTGCCCAGCTTG
	myc-Df31 for SpeI	AAAACTAGTATGGAGCAAAAACTTATATCCGAGGAGGATCTTATGGCTGATGTGGCTGAG
Df31	Df31 rev XbaI	AAATCTAGATTAGGCGGCCACTTCG
Hsp26	myc-Hsp26 for EcoRI	AAAGAATTCATGGAGCAAAAACTTATATCCGAGGAGGATCTTATGTCGCTATCTACTCTGCTTTC
	Hsp26 rev XbaI	AAATCTAGATTACTTGTCCTTGCCGTTG
	myc-Hsp26 for SpeI	AAAACTAGTATGGAGCAAAAACTTATATCCGAGGAGGATCTTATGTCGCTATCTACTCTGCTTTC
	Hsp26 rev XhoI	AAACTCGAGTTACTTGTCCTTGCCGTTG
p47	myc-p47 for	AAAGAATTCATGGAGCAAAAACTTATATCCGAGGAGGATCTTATGGCAGCTCGTGGTGATTTGATTGC
	p47 rev XbaI	AAATCTAGATTACTTGAGGCGCTGCAT
Pen	myc-Pen for KpnI	AAAGGTACCATGGAGCAAAAACTTATATCCGAGGAGGATCTTATGAGTAAGGCGGATTCTAACT
	Pen rev ApaI	AAAGGGCCCTTAGAACGTGTAGCCACCTTC
PyK	myc-PyK for SpeI	AAAACTAGTATGGAGCAAAAACTTATATCCGAGGAGGATCTTATGGTGAACGTAACCATCTACG
	PyK rev XhoI	AAACTCGAGTTATTCGACGGTGACAATGC
Tsn	myc-Tsn for KpnI	AAAGGTACCATGGAGCAAAAACTTATATCCGAGGAGGATCTTATGGCAACAGCAGCGAA
	Tsn rev XbaI	AAATCTAGATTAGCGGAACTCGGGC
FRET
mCer- and mEYFP constructs	h-sp-EGFP for HindIII	AAAAAGCTTGCCACCATGAAGACCATCATCGCCCTGAGCTACATCTTCTGCCTGGTGTTCGCCATGGTGAGCAAGGGC
	EGFP- linkerII rev XhoI	AAAACTCGAGGCTACCTCCGCCACCACTTCCACCGCCTCCAGAACCTCCTCCACCCTTGTACAGCTCGTCCATG
	EGFP linkerII Stop rev XbaI	AAAATCTAGATTAGCTACCTCCGCCACCACTTCCACCGCCTCCAGAACCTCCTCCACCCTTGTACAGCTCGTCCATG
	EGFP for XhoI	AAACTCGAGATGGTGAGCAAGGGC
	EGFP rev XbaI	AAAATCTAGATTACTTGTACAGCTCGTCCATG
	NtFT4 for XhoI	AGACTCGAGATGCCAAGAATAGATCCTTTG
