# Supplementary material for: The tobacco phosphatidylethanolamine-binding protein NtFT4 increases the lifespan of Drosophila melanogaster by interacting with the proteostasis network
Source: Aging (Albany NY). 2022 Apr 8;14(7):2989–3029. doi: 10.18632/aging.204005 (PMC9037272; doi:10.18632/aging.204005)
Supplement: Supplementary Table 9 [file aging-14-204005-s008.xlsx]

## Sheet: Supplementary Table 9
Supplementary Table 9. The p-values for t-tests and ANOVA followed by Tukey’s post hoc test.
Figure 1 C				Figure 1 E				Figure 1 F
Tukey's Test				Tukey's Test				Tukey's Test
Tobacco flowering time		P value		Arabidopsis flowering time		P value		Leaf number		P value
VC	PEBP1	0.01605		Col-0	RKIP	0.99999		Col-0	RKIP	0.72143
VC	CG7054	0.26497		Col-0	hPEBP4	0.09133		Col-0	hPEBP4	0.99955
VC	CG7054-DS	0.99554		Col-0	CG7054	0.69769		Col-0	CG7054	0.99955
VC	hPEBP4	0.99977		Col-0	PEBP1	0.45426		Col-0	PEBP1	0.98814
VC	RKIP	0.97358		Col-0	NtFT4	2.13294e-08		Col-0	NtFT4	0.000168414
PEBP1	CG7054	0.58203		RKIP	hPEBP4	0.11982		RKIP	hPEBP4	0.52861
PEBP1	CG7054-DS	0.00102		RKIP	CG7054	0.7733		RKIP	CG7054	0.52861
PEBP1	hPEBP4	5.93555e-06		RKIP	PEBP1	0.53453		RKIP	PEBP1	0.96836
PEBP1	RKIP	0.00427		RKIP	NtFT4	2.29455e-08		RKIP	NtFT4	3.78613e-08
CG7054	CG7054-DS	0.15776		hPEBP4	CG7054	0.7733		hPEBP4	CG7054	1
CG7054	hPEBP4	0.00549		hPEBP4	PEBP1	0.93766		hPEBP4	PEBP1	0.9329
CG7054	RKIP	0.32753		hPEBP4	NtFT4	1.86763e-06		hPEBP4	NtFT4	3.95007e-06
CG7054-DS	hPEBP4	0.85038		CG7054	PEBP1	0.99862		CG7054	PEBP1	0.9329
CG7054-DS	RKIP	0.99917		CG7054	NtFT4	5.5816e-08		CG7054	NtFT4	3.95007e-06
hPEBP4	RKIP	0.64648		PEBP1	NtFT4	1.63476e-07		PEBP1	NtFT4	3.20944e-07
Figure 3 A				Figure 3 B
Tukey's Test
Negative Geotaxis, female flies		P value		Negative Geotaxis, male flies		P value
NtFT4, 10 d	control, 10 d	0.41374		NtFT4, 10 d	control, 10 d	1.17815e-09
CG7054-dsRNA, 10 d	control, 10 d	0		CG7054-dsRNA, 10 d	control, 10 d	0.98183
NtFT4, 10 d	CG7054-dsRNA, 10 d	0		NtFT4, 10 d	CG7054-dsRNA, 10 d	2.3575e-09
NtFT4, 30 d	control, 30 d	3.14961e-06		NtFT4, 30 d	control, 30 d	0
CG7054-dsRNA, 30 d	control, 30 d	0.000174873		CG7054-dsRNA, 30 d	control, 30 d	1
NtFT4, 30 d	CG7054-dsRNA, 30 d	8.70819e-10		NtFT4, 30 d	CG7054-dsRNA, 30 d	2.40633e-09
NtFT4, 45 d	control, 45 d	0.00608		NtFT4, 45 d	control, 45 d	5.18968e-09
control, 30 d	control, 10 d	1.19563e-08		control, 30 d	control, 10 d	0
control, 45 d	control, 10 d	4.38117e-08		control, 45 d	control, 10 d	0
control, 45 d	control, 30 d	4.40543e-06		control, 45 d	control, 30 d	0.03558
NtFT4, 30 d	NtFT4, 10 d	1.98222e-09		NtFT4, 30 d	NtFT4, 10 d	0
NtFT4, 45 d	NtFT4, 10 d	8.48882e-07		NtFT4, 45 d	NtFT4, 10 d	2.18035e-08
NtFT4, 45 d	NtFT4, 30 d	3.3461e-09		NtFT4, 45 d	NtFT4, 30 d	8.61306e-09
CG7054-dsRNA, 30 d	CG7054-dsRNA, 10 d	0		CG7054-dsRNA, 30 d	CG7054-dsRNA, 10 d	0
NtFT4, 30 d	control, 10 d	0		NtFT4, 30 d	control, 10 d	4.88943e-09
CG7054-dsRNA, 30 d	control, 10 d	1.35613e-07		CG7054-dsRNA, 30 d	control, 10 d	0
NtFT4, 45 d	control, 10 d	1.28175e-08		NtFT4, 45 d	control, 10 d	0
NtFT4, 10 d	control, 30 d	1.3314e-08		NtFT4, 10 d	control, 30 d	4.3533e-09
CG7054-dsRNA, 10 d	control, 30 d	0		CG7054-dsRNA, 10 d	control, 30 d	0
NtFT4, 45 d	control, 30 d	0.6359		NtFT4, 45 d	control, 30 d	7.32466e-09
NtFT4, 10 d	control, 45 d	1.32391e-08		NtFT4, 10 d	control, 45 d	8.61076e-08
CG7054-dsRNA, 10 d	control, 45 d	0		CG7054-dsRNA, 10 d	control, 45 d	0
NtFT4, 30 d	control, 45 d	4.86166e-10		NtFT4, 30 d	control, 45 d	0
CG7054-dsRNA, 30 d	control, 45 d	0.9758		CG7054-dsRNA, 30 d	control, 45 d	0.07713
CG7054-dsRNA, 30 d	NtFT4, 10 d	2.27295e-07		CG7054-dsRNA, 30 d	NtFT4, 10 d	8.34597e-09
CG7054-dsRNA, 10 d	NtFT4, 30 d	3.55595e-08		CG7054-dsRNA, 10 d	NtFT4, 30 d	3.92869e-09
CG7054-dsRNA, 10 d	NtFT4, 45 d	0		CG7054-dsRNA, 10 d	NtFT4, 45 d	0
CG7054-dsRNA, 30 d	NtFT4, 45 d	0.09126		CG7054-dsRNA, 30 d	NtFT4, 45 d	4.32022e-06
Figure 4B
One-sample t-test					Student's t-test
FRET-efficiency vs negative control		P value			FRET efficiency Cer-NtFT4 vs Cer-CG7054
Acceptor	Cer (Hypothetical mean)	Cer-CG7054	Cer-NtFT4		Acceptor	P value
EYFP-CCT7	0.0015	0.53594	0.00982		EYFP-CCT7	0.000751465
EYFP-CG4364	0.0027	0.94813	0.00834		EYFP-CG4364	0.000411391
EYFP-DF31	0.0142	0.44777	0.07664		EYFP-DF31	0.20718
EYFP-HSP26	0.0078	0.1034	0.00179		EYFP-HSP26	0.000113755
EYFP-P47	0.0024	0.94354	0.19966		EYFP-P47	0.182
EYFP-PEN	0.0022	0.45415	0.00495		EYFP-PEN	0.000254966
EYFP-PyK	0.0088	0.55155	0.00565		EYFP-PyK	0.000232112
EYFP-TSN	0	0.31115	0.01087		EYFP-TSN	0.00212
Figure 5A, B
Student's t-test
Heat shock response		P value
	non-transfected	HA-EGFP	HA-NtFT4	HA-EGFP-NtFT4
Hsp22	0.00465	0.00961	0.000131557	0.01094
Hsp23	0.00653	0.0433	0.000945302	0.01735
Hsp26	0.00983	0.00456	9.61829e-07	0.00171
Hsp27	0.04733	0.00114	0.00551	0.003
Hsp70Aa	0.00511	0.02106	0.00343	0.04267
Hsc70-4	0.08584	0.2377	0.83459	0.80462
HspB8	0.97807	0.75263	0.98782	0.50942
l(2)efl	0.43566	0.2644	0.814	0.33124
Tukey's Test					P value
Transfection response		Hsp22	Hsp22 (heat shock)	Hsp23	Hsp23 (heat shock)	Hsp26	Hsp26 (heat shock)	Hsp27	Hsp27 (heat shock)
HA-EGFP	non-transfected	0.48558	0.67523	0.17369	0.32135	0.29373	0.37383	0.08934	0.33109
HA-NtFT4	non-transfected	0.42346	0.49929	0.19546	0.27776	0.27335	0.29185	0.07929	0.31197
HA-NtFT4	HA-EGFP	0.99926	0.98787	0.99974	0.9994	0.99993	0.99687	0.99976	0.99996
HA-EGFP-NtFT4	non-transfected	0.42272	0.55846	0.25554	0.32696	0.28916	0.52544	0.11875	0.33887
HA-EGFP-NtFT4	HA-EGFP	0.99923	0.99648	0.99094	1	1	0.98923	0.99682	1
HA-EGFP-NtFT4	HA-NtFT4	1	0.99948	0.99684	0.99915	0.99997	0.95488	0.99113	0.99988
					P value
Transfection response		Hsp70Aa	Hsp70Aa (heat shock)	Hsc70-4	Hsc70-4 (heat shock)	HspB8	HspB8 (heat shock)	l(2)efl	l(2)efl (heat shock)
HA-EGFP	non-transfected	0.30994	0.86503	0.9943	0.39223	0.92694	0.99945	0.5627	0.6514
HA-NtFT4	non-transfected	0.33187	0.72169	0.92274	0.07271	0.99035	0.99687	0.68797	0.57881
HA-NtFT4	HA-EGFP	0.99993	0.99105	0.98099	0.61163	0.98869	0.99972	0.99568	0.99915
HA-EGFP-NtFT4	non-transfected	0.40051	0.83147	0.99745	0.02996	0.99985	0.92611	0.7114	0.94669
HA-EGFP-NtFT4	HA-EGFP	0.99634	0.42131	0.99992	0.30408	0.90196	0.95734	0.99281	0.91398
HA-EGFP-NtFT4	HA-NtFT4	0.9985	0.29787	0.97118	0.91876	0.98181	0.97546	0.99997	0.86315
Figure 6 A-D
Student's t-test
Relative gene expression: da > NtFT4 vs da-Gal4
10 d	P value		20 d	P value		50 d	P value
Hsp26	0.01709		Hsp26	0.05303		Hsp26	0.04002
Hsp27	0.01665		Hsp27	0.00473		Hsp27	0.01911
Hsp22	0.28787		Hsp22	0.1178		Hsp22	0.51197
Hsp23	0.96447		Hsp23	0.0013		Hsp23	0.20055
Hsp83	0.56798		Hsp83	0.93994		Hsp83	0.69406
HspB8	0.12686		HspB8	0.1912		HspB8	0.91467
Hsc70-3	0.68479		Hsc70-3	0.75202		Hsc70-3	0.58023
Hsc70-4	0.84299		Hsc70-4	0.45875		Hsc70-4	0.99884
DnaJ-1	0.22999		DnaJ-1	0.02975		DnaJ-1	0.18191
l(2)efl	0.96098		l(2)efl	0.04224		l(2)efl	0.56487
Hsp68	0.09566		Hsp68	0.06254		Hsp68	0.1542
Hsp70Aa	0.07277		Hsp70Aa	0.00184		Hsp70Aa	0.07781
Tukey's Test				P value
Age-dependent expression		Hsp26	Hsp27	Hsp22	Hsp23	Hsp83	HspB8
Co 10 d	Co 20 d	0.76746	0.71595	0.78308	0.6467	0.46993	0.84166
Co 10 d	Co 50 d	0.96835	0.82212	0.81555	0.35886	0.59254	0.69953
Co 20 d	Co 50 d	0.63103	0.39523	0.44579	0.11374	0.97127	0.39956
NtFT4 10 d	NtFT4 20 d	0.98892	0.94539	0.79615	0.97232	0.22199	0.22545
NtFT4 10 d	NtFT4 50 d	0.99316	0.71965	0.62544	0.34093	0.54037	0.999
NtFT4 20 d	NtFT4 50 d	0.96528	0.88572	0.95038	0.25968	0.73153	0.21376
				P value
Age-dependent expression		Hsc70-3	Hsc70-4	DnaJ-1	l(2)efl	Hsp68	Hsp70Aa
Co 10 d	Co 20 d	0.48198	0.89379	0.99922	0.9597	0.90012	0.21725
Co 10 d	Co 50 d	0.42281	0.83583	0.09795	0.63442	0.21487	0.5194
Co 20 d	Co 50 d	0.99196	0.58404	0.09338	0.48556	0.12278	0.05053
NtFT4 10 d	NtFT4 20 d	0.35434	0.98243	0.07699	0.99012	0.02368	0.04128
NtFT4 10 d	NtFT4 50 d	0.43678	0.81899	0.03673	0.44481	0.17527	0.30295
NtFT4 20 d	NtFT4 50 d	0.98139	0.90354	0.82559	0.38289	0.30916	0.00675
Figure 7 B
Student's t-test
Relative gene expression: da > NtFT4 vs da-Gal4
1 d	P value		5 d	P value		10 d	P value
CG1304	0.03082		CG1304	0.06882		CG1304	0.0137
Ser6	0.01184		Ser6	0.04284		Ser6	0.08842
CG31205	0.000381742		CG31205	0.00166		CG31205	0.0077
CG31681	0.04725		CG31681	0.01769		CG31681	0.03756
CG32277	0.4084		CG32277	0.02306		CG32277	0.02728
CG32523	0.00136		CG32523	0.01935		CG32523	0.19025
Jon66Ci	0.00382		Jon66Ci	0.00719		Jon66Ci	0.30807
Spn47C	0.00731		Spn47C	0.01836		Spn47C	0.04153
Figure 7 C
Student's t-test
Relative gene expression: da > NtFT4 vs da-Gal4
1 d	P value		5 d	P value		10 d	P value
GstD1	0.07004		GstD1	0.03251		GstD1	0.00913
GstD3	0.40351		GstD3	0.47111		GstD3	0.16667
GstE3	0.24459		GstE3	0.67871		GstE3	0.12958
GstE9	0.10222		GstE9	0.72614		GstE9	0.24146
Fad2	0.0249		Fad2	0.03033		Fad2	0.00508
Student's t-test
Relative gene expression: da > NtFT4 vs da-Gal4
1 d	P value		5 d	P value		10 d	P value
CG10163	0.18746		CG10163	0.76136		CG10163	0.85359
CG4302	0.00226		CG4302	0.000374812		CG4302	9.17043e-05
GstD9	0.03063		GstD9	0.00507		GstD9	0.03971
GstE10	0.57205		GstE10	0.942		GstE10	0.62947
GstE7	0.11717		GstE7	0.16204		GstE7	0.04945
GstE8	0.07868		GstE8	0.8101		GstE8	0.95513
α-Est10	0.04868		α-Est10	0.00113		α-Est10	0.00345
CG13822	0.34854		CG13822	0.0084		CG13822	2.40787e-05
CG15820	0.04283		CG15820	0.16291		CG15820	0.20004
CG17322	0.000413122		CG17322	0.00209		CG17322	4.83675e-05
CG18609	0.0617		CG18609	0.00595		CG18609	0.01859
CG9945	0.13193		CG9945	0.10219		CG9945	0.76836
Cyp313a1	0.34114		Cyp313a1	0.20615		Cyp313a1	0.23201
Cyp6a17	6.93686e-06		Cyp6a17	0.00272		Cyp6a17	0.00037747
GstE5	0.02825		GstE5	0.11513		GstE5	0.08461
Odc1	0.01937		Odc1	0.07587		Odc1	0.0211
Figure 7 D
Student's t-test
Relative gene expression: da > NtFT4 vs da-Gal4
1 d	P value		5 d	P value		10 d	P value
CG12057	0.00533		CG12057	0.83967		CG12057	0.16978
CG14406	0.000687889		CG14406	0.000353664		CG14406	9.385e-05
CG14410	0.0071		CG14410	0.01642		CG14410	0.000166405
CG15570	0.55061		CG15570	0.2633		CG15570	0.16072
CG15571	0.54171		CG15571	0.18924		CG15571	0.26014
LysP	0.01892		LysP	0.08244		LysP	0.42629
Nop60B	0.18351		Nop60B	0.22176		Nop60B	0.00226
sei	0.28882		sei	0.11321		sei	0.06122
tkv	0.35729		tkv	0.15301		tkv	0.00384
Student's t-test
Relative gene expression: da > NtFT4 vs da-Gal4
1 d	P value		5 d	P value		10 d	P value
2mit	0.97203		2mit	0.05054		2mit	0.00684
CG11825	0.01804		CG11825	0.00255		CG11825	0.00205
CG13422	0.08048		CG13422	0.07179		CG13422	0.03849
CG16898	0.00211		CG16898	0.00291		CG16898	0.0024
CG17478	1.00503e-05		CG17478	0.000533698		CG17478	0.00155
CG2022	0.01998		CG2022	0.40178		CG2022	0.40434
CG30272	0.33081		CG30272	0.20839		CG30272	0.30532
CG42825	0.00528		CG42825	0.000162309		CG42825	0.01656
CG7837	0.00271		CG7837	0.03772		CG7837	0.00178
Drsl4	0.03738		Drsl4	0.0841		Drsl4	0.01338
l(2)03659	0.000573904		l(2)03659	0.00258		l(2)03659	0.00115
Lectin Gal-C	0.67083		Lectin Gal-C	0.01411		Lectin Gal-C	0.10008
Npc2d	0.52738		Npc2d	0.000337431		Npc2d	0.33921
Figure S2
Tukey's Test		P value
Protein carbonylation		female	male
Control 10 d	CG7054 10 d	0.98949	1
Control 10 d	NtFT4 10 d	0.99992	0.99222
CG7054 10 d	NtFT4 10 d	0.92179	0.99855
Control 30 d	CG7054 30 d	0.75508	0.99906
Control 30 d	NtFT4 30 d	0.99677	1
CG7054 30 d	NtFT4 30 d	0.37497	0.99636
Control 10 d	Control 30 d	0.83318	0.99999
CG7054 10 d	CG7054 30 d	0.997	0.98925
NtFT4 10 d	NtFT4 30 d	0.67864	0.98273
